# Supplementary material for: Identifying Methylation-Driven Immune-related Molecular Subtypes Predicts the Prognosis of Hepatocellular Carcinoma
Source: Research Square preprint supplement (doi:10.21203/rs.3.rs-737824/v1), 2021-07-28
Supplement: Supplementary file 1 [file 0d86b9207c903b0f2445b091.xlsx]

## Sheet: Supplementary Table 4-BP
Supplementary Tables 1:The top 30 items enriched Biological process GO annotations
ID	Description	GeneRatio	BgRatio	pvalue	p.adjust	qvalue	geneID	Count
GO:0002694	regulation of leukocyte activation	64/408	492/17913	2.41156e-30	8.39417e-27	4.59296e-27	IL23A/TNFRSF13C/NR1H3/NCK1/PIK3R1/SRC/ITGB2/TNFRSF1B/AGER/IL12RB1/MIF/IGF2/IL4R/NOD2/HLA-F/C5AR1/RAC1/RARA/LAT/PDCD1/MAP3K8/CD81/HLA-DMB/IL6/HFE/FCER1G/IL18/SOCS1/STAT6/IL13/MDK/AKT1/IL12B/GRN/INHA/BMP4/TLR6/CLCF1/TNFRSF18/SDC4/TLR4/HMGB1/CD74/IL1RL2/PAK1/MALT1/ZAP70/MICA/VAV1/RORA/TNFSF11/SOS1/SFTPD/FLT3LG/TGFBR2/WNT5A/PAK2/TNFSF4/IL7/CD40/FES/IL4/VCAM1/KLRK1	64
GO:0001819	positive regulation of cytokine production	61/408	446/17913	3.75662e-30	8.39417e-27	4.59296e-27	IRF5/IL23A/TNFRSF13C/TLR3/IRF7/RSAD2/PIK3R1/SRC/AGER/IL12RB1/MIF/IL4R/NOD2/HLA-F/CXCL17/C5AR1/NLRX1/RARA/INS/IL17RC/ELANE/TMEM173/CD81/SLC11A1/MAPK3/IL6/PF4/FCER1G/IL18/HGF/LRP1/STAT6/STAT3/IL13/IL1R1/MDK/IL12B/NFATC4/MAPK14/TLR1/TLR6/TNFRSF8/IL1RAP/CREB1/TLR4/EIF2AK2/HMGB1/CD74/IL1RL2/MALT1/CHUK/RORA/WNT5A/TNFSF4/IRF3/FURIN/JAK2/IL7/CD40/IL4/KLRK1	61
GO:0042110	T cell activation	59/408	443/17913	1.54811e-28	2.30616e-25	1.26184e-25	IL23A/TNFRSF13C/LEPR/NCK1/RSAD2/PIK3R1/SRC/TNFRSF1B/AGER/IL12RB1/IGF2/IL4R/NOD2/RAC1/RARA/LAT/INS/PDCD1/MAP3K8/CD81/HLA-DMB/MICB/SLC11A1/IL6/HFE/IL18/SOCS1/STAT6/STAT3/PRLR/MDK/AKT1/IL12B/BMP4/NEDD4/PPP3CB/TNFRSF18/SDC4/CCR6/HMGB1/CD74/IL1RL2/PAK1/MALT1/ZAP70/MICA/VAV1/RORA/TNFSF11/SOS1/SFTPD/TGFBR2/PAK2/TNFSF4/RORC/IL7/IL4/VCAM1/KLRK1	59
GO:0032147	activation of protein kinase activity	49/408	303/17913	1.1401e-27	1.15855e-24	6.33912e-25	DAXX/IL23A/TLR3/PTK2B/TGFA/TGFB3/SRC/NOD2/CXCL17/C5AR1/INS/TNFRSF10B/GHRL/MAP3K8/GHR/CD81/SLC11A1/FGF1/MAPK3/IL18/SOCS1/HGF/PRLR/MAP2K1/AKT1/IL12B/MAPK14/PDGFB/BMP4/TLR6/TDGF1/MADD/ACVR2B/RAF1/TLR4/EIF2AK2/CD74/GDF15/MALT1/FGF2/PIK3CB/TNFSF11/TGFBR2/WNT5A/TGFB2/JAK2/IL4/BMP2/MAP2K2	49
GO:0050867	positive regulation of cell activation	50/408	319/17913	1.43299e-27	1.15855e-24	6.33912e-25	IL23A/TNFRSF13C/NCK1/PIK3R1/SRC/ITGB2/AGER/IL12RB1/MIF/IGF2/IL4R/NOD2/HLA-F/RAC1/RARA/PDCD1/MAP3K8/CD81/HLA-DMB/IL6/FCER1G/IL18/SOCS1/STAT6/IL13/MDK/AKT1/IL12B/TLR6/CLCF1/TLR4/HMGB1/CD74/IL1RL2/PAK1/MALT1/ZAP70/VAV1/TNFSF11/FLT3LG/TGFBR2/WNT5A/PAK2/TNFSF4/JAK2/IL7/CD40/IL4/VCAM1/KLRK1	50
GO:0002696	positive regulation of leukocyte activation	49/408	305/17913	1.55544e-27	1.15855e-24	6.33912e-25	IL23A/TNFRSF13C/NCK1/PIK3R1/SRC/ITGB2/AGER/IL12RB1/MIF/IGF2/IL4R/NOD2/HLA-F/RAC1/RARA/PDCD1/MAP3K8/CD81/HLA-DMB/IL6/FCER1G/IL18/SOCS1/STAT6/IL13/MDK/AKT1/IL12B/TLR6/CLCF1/TLR4/HMGB1/CD74/IL1RL2/PAK1/MALT1/ZAP70/VAV1/TNFSF11/FLT3LG/TGFBR2/WNT5A/PAK2/TNFSF4/IL7/CD40/IL4/VCAM1/KLRK1	49
GO:0043410	positive regulation of MAPK cascade	61/408	499/17913	2.00914e-27	1.28269e-24	7.0184e-25	PDGFRA/DAXX/TLR3/PTK2B/TGFA/FGFR3/FGFR4/ILK/TGFB3/SRC/AGER/CALCR/MIF/IGF2/NELFE/NOD2/SEMA4C/CXCL17/C5AR1/INS/GHRL/MAP3K8/GHR/ELANE/FGF20/CD81/FGF1/MAPK3/IL6/KL/HGF/LRP1/MAP2K1/MAPK14/PDGFB/BMP4/PRKCA/TLR6/TDGF1/ROBO1/MADD/BRAF/RAF1/TLR4/EIF2AK2/HMGB1/CD74/GDF15/PAK1/FGF18/FGF2/PIK3CB/TNFSF11/LTBR/WNT5A/GCG/TGFB2/JAK2/CD40/BMP2/MAP2K2	61
GO:0051249	regulation of lymphocyte activation	55/408	401/17913	2.84249e-27	1.58789e-24	8.6883e-25	IL23A/TNFRSF13C/NCK1/PIK3R1/SRC/TNFRSF1B/AGER/IL12RB1/MIF/IGF2/IL4R/NOD2/HLA-F/RAC1/RARA/LAT/PDCD1/MAP3K8/CD81/HLA-DMB/IL6/HFE/IL18/SOCS1/STAT6/IL13/MDK/AKT1/IL12B/INHA/BMP4/CLCF1/TNFRSF18/SDC4/TLR4/HMGB1/CD74/IL1RL2/PAK1/MALT1/ZAP70/MICA/VAV1/TNFSF11/SOS1/SFTPD/FLT3LG/TGFBR2/PAK2/TNFSF4/IL7/CD40/IL4/VCAM1/KLRK1	55
GO:0045088	regulation of innate immune response	57/408	440/17913	6.00732e-27	2.98297e-24	1.63216e-24	PSMD4/NRAS/TLR3/NR1H3/ESR1/IRF7/RSAD2/SRC/ITGB2/NOD2/HLA-F/NLRX1/PSMC5/INS/ICAM2/TMEM173/TRAF3/FCER1G/SOCS1/ADAR/JAK1/PSMB8/PSMB9/PSME1/PSMD1/IL12B/GRN/SARM1/PSMD14/TLR1/TLR6/PSME2/UNC93B1/IKBKB/RAF1/TLR4/HMGB1/S100A1/NR1H2/PSMC4/PAK1/MALT1/PPARG/MICA/VAV1/CHUK/SFTPD/TANK/WNT5A/PSMC3/PAK2/CTSB/IL18RAP/PSMD8/IRF3/JAK2/KLRK1	57
GO:0051251	positive regulation of lymphocyte activation	45/408	258/17913	6.67585e-27	2.98344e-24	1.63242e-24	IL23A/TNFRSF13C/NCK1/PIK3R1/SRC/AGER/IL12RB1/MIF/IGF2/IL4R/NOD2/HLA-F/RAC1/RARA/PDCD1/MAP3K8/CD81/HLA-DMB/IL6/IL18/SOCS1/STAT6/IL13/MDK/AKT1/IL12B/CLCF1/TLR4/HMGB1/CD74/IL1RL2/PAK1/MALT1/ZAP70/VAV1/TNFSF11/FLT3LG/TGFBR2/PAK2/TNFSF4/IL7/CD40/IL4/VCAM1/KLRK1	45
GO:0045785	positive regulation of cell adhesion	52/408	388/17913	2.51041e-25	1.01991e-22	5.58055e-23	IL23A/TNFRSF13C/PTK2B/NCK1/ILK/PIK3R1/SRC/ITGB2/AGER/IL12RB1/IGF2/IL4R/NOD2/RAC1/RARA/CCL28/PDCD1/MAP3K8/NFAT5/ELANE/CD81/HLA-DMB/IL6/IL18/SOCS1/ITGAV/MDK/AKT1/IL12B/VTN/PRKCA/TNFRSF18/SDC4/HMGB1/CD74/IL1RL2/PAK1/MALT1/ZAP70/VAV1/TNFSF11/TGFBR2/WNT5A/PAK2/TGFB2/TNFSF4/CALR/JAK2/IL7/IL4/VCAM1/KLRK1	52
GO:0022407	regulation of cell-cell adhesion	52/408	389/17913	2.8402e-25	1.05774e-22	5.78753e-23	IL23A/TNFRSF13C/PTK2/NCK1/PIK3R1/SRC/ITGB2/AGER/IL12RB1/IGF2/IL4R/NOD2/RAC1/RARA/CCL28/PDCD1/MAP3K8/NFAT5/ELANE/CD81/HLA-DMB/IL6/HFE/IL18/SOCS1/MDK/AKT1/IL12B/MAPK14/BMP4/PRKCA/SDC4/HMGB1/CD74/IL1RL2/PAK1/MALT1/ZAP70/JAG1/VAV1/TNFSF11/SFTPD/TGFBR2/WNT5A/PAK2/TNFSF4/JAK2/IL7/IL4/VCAM1/BMP2/KLRK1	52
GO:1903039	positive regulation of leukocyte cell-cell adhesion	40/408	214/17913	3.43236e-25	1.17994e-22	6.45616e-23	IL23A/TNFRSF13C/NCK1/PIK3R1/SRC/ITGB2/AGER/IL12RB1/IGF2/IL4R/NOD2/RAC1/RARA/PDCD1/MAP3K8/NFAT5/ELANE/CD81/HLA-DMB/IL6/IL18/SOCS1/MDK/AKT1/IL12B/HMGB1/CD74/IL1RL2/PAK1/MALT1/ZAP70/VAV1/TNFSF11/TGFBR2/PAK2/TNFSF4/IL7/IL4/VCAM1/KLRK1	40
GO:0018108	peptidyl-tyrosine phosphorylation	49/408	346/17913	5.4687e-25	1.74569e-22	9.55172e-23	PDGFRA/IL23A/PTK2B/PTK2/TGFA/FGFR3/FGFR4/SEMA4D/SRC/ITGB2/MIF/IGF2/CBLC/BDNF/GHRL/GHR/CD81/MAPK3/IL6/IL18/SOCS1/HGF/STAT3/IL13/PRLR/TIE1/MAP2K1/JAK1/IL12B/VTN/PDGFB/CLCF1/TDGF1/TNFRSF18/EIF2AK2/CD74/ZAP70/TYK2/CRLF1/PAK2/MET/JAK2/FGF7/IL7/CD40/FES/IL4/CNTF/MAP2K2	49
GO:0018212	peptidyl-tyrosine modification	49/408	349/17913	8.11584e-25	2.41798e-22	1.32302e-22	PDGFRA/IL23A/PTK2B/PTK2/TGFA/FGFR3/FGFR4/SEMA4D/SRC/ITGB2/MIF/IGF2/CBLC/BDNF/GHRL/GHR/CD81/MAPK3/IL6/IL18/SOCS1/HGF/STAT3/IL13/PRLR/TIE1/MAP2K1/JAK1/IL12B/VTN/PDGFB/CLCF1/TDGF1/TNFRSF18/EIF2AK2/CD74/ZAP70/TYK2/CRLF1/PAK2/MET/JAK2/FGF7/IL7/CD40/FES/IL4/CNTF/MAP2K2	49
GO:0043406	positive regulation of MAP kinase activity	42/408	250/17913	1.70785e-24	4.77024e-22	2.61009e-22	DAXX/PTK2B/TGFA/ILK/TGFB3/SRC/AGER/MIF/NOD2/CXCL17/C5AR1/GHRL/MAP3K8/GHR/ELANE/CD81/FGF1/MAPK3/HGF/MAP2K1/MAPK14/PDGFB/BMP4/TLR6/TDGF1/ROBO1/MADD/RAF1/TLR4/EIF2AK2/CD74/GDF15/PAK1/FGF18/FGF2/PIK3CB/TNFSF11/WNT5A/JAK2/CD40/BMP2/MAP2K2	42
GO:1903037	regulation of leukocyte cell-cell adhesion	45/408	295/17913	2.25104e-24	5.9176e-22	3.23788e-22	IL23A/TNFRSF13C/NCK1/PIK3R1/SRC/ITGB2/AGER/IL12RB1/IGF2/IL4R/NOD2/RAC1/RARA/CCL28/PDCD1/MAP3K8/NFAT5/ELANE/CD81/HLA-DMB/IL6/HFE/IL18/SOCS1/MDK/AKT1/IL12B/BMP4/SDC4/HMGB1/CD74/IL1RL2/PAK1/MALT1/ZAP70/VAV1/TNFSF11/SFTPD/TGFBR2/PAK2/TNFSF4/IL7/IL4/VCAM1/KLRK1	45
GO:0050863	regulation of T cell activation	45/408	307/17913	1.22772e-23	3.04816e-21	1.66783e-21	IL23A/TNFRSF13C/NCK1/PIK3R1/SRC/TNFRSF1B/AGER/IL12RB1/IGF2/IL4R/NOD2/RAC1/RARA/LAT/PDCD1/MAP3K8/CD81/HLA-DMB/IL6/HFE/IL18/SOCS1/MDK/AKT1/IL12B/BMP4/TNFRSF18/SDC4/HMGB1/CD74/IL1RL2/PAK1/MALT1/ZAP70/VAV1/TNFSF11/SOS1/SFTPD/TGFBR2/PAK2/TNFSF4/IL7/IL4/VCAM1/KLRK1	45
GO:0022409	positive regulation of cell-cell adhesion	41/408	251/17913	1.90105e-23	4.47146e-21	2.44661e-21	IL23A/TNFRSF13C/NCK1/PIK3R1/SRC/ITGB2/AGER/IL12RB1/IGF2/IL4R/NOD2/RAC1/RARA/PDCD1/MAP3K8/NFAT5/ELANE/CD81/HLA-DMB/IL6/IL18/SOCS1/MDK/AKT1/IL12B/HMGB1/CD74/IL1RL2/PAK1/MALT1/ZAP70/VAV1/TNFSF11/TGFBR2/WNT5A/PAK2/TNFSF4/IL7/IL4/VCAM1/KLRK1	41
GO:0050870	positive regulation of T cell activation	37/408	198/17913	2.28188e-23	5.09887e-21	2.7899e-21	IL23A/TNFRSF13C/NCK1/PIK3R1/SRC/AGER/IL12RB1/IGF2/IL4R/NOD2/RAC1/RARA/PDCD1/MAP3K8/CD81/HLA-DMB/IL6/IL18/SOCS1/MDK/AKT1/IL12B/HMGB1/CD74/IL1RL2/PAK1/MALT1/ZAP70/VAV1/TNFSF11/TGFBR2/PAK2/TNFSF4/IL7/IL4/VCAM1/KLRK1	37
GO:0007159	leukocyte cell-cell adhesion	46/408	328/17913	2.55275e-23	5.43249e-21	2.97245e-21	IL23A/TNFRSF13C/NCK1/PIK3R1/SEMA4D/SRC/ITGB2/AGER/IL12RB1/IGF2/IL4R/NOD2/RAC1/RARA/CCL28/PDCD1/MAP3K8/NFAT5/ELANE/CD81/HLA-DMB/IL6/HFE/IL18/SOCS1/MDK/AKT1/IL12B/BMP4/SDC4/HMGB1/CD74/IL1RL2/PAK1/MALT1/ZAP70/VAV1/TNFSF11/SFTPD/TGFBR2/PAK2/TNFSF4/IL7/IL4/VCAM1/KLRK1	46
GO:0045089	positive regulation of innate immune response	48/408	373/17913	1.19311e-22	2.42365e-20	1.32613e-20	PSMD4/NRAS/TLR3/NR1H3/ESR1/IRF7/RSAD2/SRC/ITGB2/NOD2/HLA-F/NLRX1/PSMC5/ICAM2/TMEM173/TRAF3/FCER1G/PSMB8/PSMB9/PSME1/PSMD1/IL12B/SARM1/PSMD14/TLR1/TLR6/PSME2/UNC93B1/IKBKB/RAF1/TLR4/HMGB1/S100A1/PSMC4/PAK1/MALT1/VAV1/CHUK/SFTPD/TANK/WNT5A/PSMC3/PAK2/CTSB/IL18RAP/PSMD8/IRF3/KLRK1	48
GO:0002521	leukocyte differentiation	54/408	485/17913	2.30641e-22	4.48145e-20	2.45207e-20	IL23A/TLR3/PTK2B/LEPR/IRF7/RSAD2/PIK3R1/AGER/IL12RB1/IL4R/RARA/CD81/IL6/PF4/FCER1G/IL18/SOCS1/STAT6/STAT3/MDK/FOS/IL12B/INHA/MAPK14/BMP4/PPP3CB/PRKCA/ESRRA/CLCF1/TNFRSF18/CREB1/BLNK/CCR6/TLR4/HMGB1/CD74/IL1RL2/MALT1/ZAP70/PPARG/VAV1/RORA/TNFSF11/SOS1/FLT3LG/LTBR/TGFBR2/TNFSF4/RORC/IL7/CR2/FES/IL4/VCAM1	54
GO:1903706	regulation of hemopoiesis	53/408	468/17913	2.64643e-22	4.92787e-20	2.69634e-20	PSMD4/IL23A/TLR3/PTK2B/IRF7/PIK3R1/AGER/IL12RB1/IL4R/RARA/PSMC5/PF4/IL18/SOCS1/STAT3/MDK/FOS/CSF3R/PSMB8/PSMB9/PSME1/PSMD1/IL12B/RARG/INHA/MAPK14/BMP4/PRKCA/PSMD14/ESRRA/PSME2/TNFRSF18/CREB1/ISG15/TLR4/EIF2AK2/HMGB1/CD74/PSMC4/IL1RL2/MALT1/ZAP70/JAG1/TNFSF11/SOS1/FLT3LG/TGFBR2/PSMC3/TNFSF4/PSMD8/IL7/FES/IL4	53
GO:0002697	regulation of immune effector process	51/408	441/17913	6.77938e-22	1.20925e-19	6.61654e-20	IL23A/TLR3/TGFB3/RSAD2/ITGB2/TNFRSF1B/AGER/IL12RB1/MIF/IL4R/NOD2/HLA-F/C5AR1/NLRX1/RARA/INS/TMEM173/CD81/TRAF3/HLA-DMB/MICB/MAPK3/IL6/HFE/FCER1G/IL18/STAT6/IL13/IL1R1/IL12B/GRN/VTN/MAPK14/PPP3CB/CLCF1/TLR4/HMGB1/CD74/MALT1/MICA/VAV1/WNT5A/IL18RAP/TGFB2/TNFSF4/CR2/CD40/FES/IL4/GPI/KLRK1	51
GO:0071902	positive regulation of protein serine/threonine kinase activity	44/408	322/17913	7.03524e-22	1.20925e-19	6.61654e-20	DAXX/PTK2B/TGFA/ILK/TGFB3/SRC/AGER/MIF/IGF2/NOD2/CXCL17/C5AR1/GHRL/MAP3K8/GHR/ELANE/CD81/FGF1/MAPK3/HGF/MAP2K1/AKT1/MAPK14/PDGFB/BMP4/TLR6/TDGF1/ROBO1/MADD/RAF1/TLR4/EIF2AK2/CD74/GDF15/PAK1/FGF18/FGF2/PIK3CB/TNFSF11/WNT5A/JAK2/CD40/BMP2/MAP2K2	44
GO:0002758	innate immune response-activating signal transduction	42/408	298/17913	1.90227e-21	3.14861e-19	1.7228e-19	PSMD4/NRAS/TLR3/NR1H3/ESR1/IRF7/RSAD2/SRC/ITGB2/NOD2/NLRX1/PSMC5/ICAM2/TRAF3/FCER1G/PSMB8/PSMB9/PSME1/PSMD1/SARM1/PSMD14/TLR1/TLR6/PSME2/UNC93B1/IKBKB/RAF1/TLR4/HMGB1/S100A1/PSMC4/PAK1/MALT1/CHUK/SFTPD/TANK/PSMC3/PAK2/CTSB/PSMD8/IRF3/KLRK1	42
GO:0060326	cell chemotaxis	39/408	253/17913	2.07705e-21	3.31512e-19	1.81391e-19	PDGFRA/IL23A/PTK2B/ITGB2/MIF/CXCL17/C5AR1/RAC1/CCL28/IL17RC/FGF1/MAPK3/IL6/NR4A1/PF4/HGF/MDK/CSF3R/CCL20/MAPK14/SBDS/PDGFB/CCL27/CCR6/HMGB1/CD74/EDN2/FGF18/FGF2/VAV1/TNFSF11/SFTPD/WNT5A/TGFB2/MET/CALR/CCL23/VCAM1/KLRK1	39
GO:0002218	activation of innate immune response	43/408	319/17913	3.63194e-21	5.59694e-19	3.06243e-19	PSMD4/NRAS/TLR3/NR1H3/ESR1/IRF7/RSAD2/SRC/ITGB2/NOD2/NLRX1/PSMC5/ICAM2/TMEM173/TRAF3/FCER1G/PSMB8/PSMB9/PSME1/PSMD1/SARM1/PSMD14/TLR1/TLR6/PSME2/UNC93B1/IKBKB/RAF1/TLR4/HMGB1/S100A1/PSMC4/PAK1/MALT1/CHUK/SFTPD/TANK/PSMC3/PAK2/CTSB/PSMD8/IRF3/KLRK1	43
GO:0009755	hormone-mediated signaling pathway	36/408	216/17913	5.21085e-21	7.58199e-19	4.14857e-19	DAXX/NR1D2/NR1H3/ESR1/SRC/NR2C1/RXRB/PGRMC2/NR2F2/RARA/RARB/GHRL/NR4A1/PRLR/NR2E3/RARG/RXRG/BMP4/NEDD4/VDR/UCN2/ESRRA/GHSR/NR6A1/RXRA/NR1H2/PAK1/PPARG/PPARD/NR5A2/RORA/SSTR1/DDX17/CALR/RORC/JAK2	36
