# Supplementary material for: Identifying Methylation-Driven Immune-related Molecular Subtypes Predicts the Prognosis of Hepatocellular Carcinoma
Source: Research Square preprint supplement (doi:10.21203/rs.3.rs-737824/v1), 2021-07-28
Supplement: Supplementary file 2 [file 1e8c0679494074ec82b79341.xlsx]

## Sheet: Supplementary Table 5-CC
Supplementary Tables 2:The top 30 items enriched Cellular component GO annotations
ID	Description	GeneRatio	BgRatio	pvalue	p.adjust	qvalue	geneID	Count
GO:0043235	receptor complex	37/400	292/18678	2.6419e-18	1.01713e-15	8.03694e-16	PTK2B/NR1H3/LEPR/ITGB2/TNFRSF1B/CALCR/IL12RB1/IL4R/GHR/PLXNB1/TRAF3/IL6/HFE/LRP1/NPR1/ITGAV/TSHR/TFR2/VDR/TLR1/TLR6/RNF31/ACVR2B/IL10RB/IKBKB/TLR4/ENG/CD74/RXRA/ZAP70/CHUK/VIPR1/TGFBR2/IL18RAP/CR2/CD40/BMP2	37
GO:0098552	side of membrane	31/400	359/18678	4.8752e-11	6.74159e-09	5.32691e-09	PDGFRA/TNFRSF13C/PTK2B/ITGB2/HLA-F/TAPBP/PDCD1/TRAF3/HFE/IL13/IL1R1/ITGAV/HSPA8/TFR2/RNF31/HLA-DRB1/HLA-B/IKBKB/TLR4/ENG/CD74/CHUK/HLA-DRA/FLT3LG/TGFBR2/CALR/CD40/FES/HLA-DQB1/VCAM1/MAP2K2	31
GO:0098797	plasma membrane protein complex	35/400	451/18678	5.25319e-11	6.74159e-09	5.32691e-09	PTK2B/ITGB2/KCNH2/CALCR/IL12RB1/HLA-F/TRAF3/HLA-DMB/IL6/HFE/LRP1/ITGAV/VTN/INHA/TFR2/PRKCA/TLR1/RNF31/HLA-DRB1/IL10RB/HLA-B/IKBKB/HMGB1/HLA-DMA/CD74/ZAP70/CHUK/HLA-DRA/IL18RAP/CD40/CBL/HLA-DQB1/HSPA2/VCAM1/BMP2	35
GO:0022624	proteasome accessory complex	9/400	23/18678	5.42965e-10	5.22604e-08	4.12939e-08	PSMD4/PSMC5/PSME1/PSMD1/PSMD14/PSME2/PSMC4/PSMC3/PSMD8	9
GO:0060205	cytoplasmic vesicle lumen	28/400	338/18678	1.11426e-09	7.6424e-08	6.0387e-08	HSPA6/TGFB3/MIF/IGF2/INS/VEGFB/GHRL/ELANE/PF4/HGF/HSPA8/S100P/PSMD1/GRN/MAPK14/PDGFB/PSMD14/HSP90AA1/GNLY/HMGB1/CXCL1/CAMP/PSMC3/GCG/TGFB2/CALR/CHIT1/GPI	28
GO:0031983	vesicle lumen	28/400	339/18678	1.19102e-09	7.6424e-08	6.0387e-08	HSPA6/TGFB3/MIF/IGF2/INS/VEGFB/GHRL/ELANE/PF4/HGF/HSPA8/S100P/PSMD1/GRN/MAPK14/PDGFB/PSMD14/HSP90AA1/GNLY/HMGB1/CXCL1/CAMP/PSMC3/GCG/TGFB2/CALR/CHIT1/GPI	28
GO:0098802	plasma membrane receptor complex	18/400	153/18678	5.09114e-09	2.80013e-07	2.21254e-07	PTK2B/ITGB2/CALCR/IL12RB1/TRAF3/IL6/HFE/ITGAV/TFR2/TLR1/RNF31/IL10RB/IKBKB/ZAP70/CHUK/IL18RAP/CD40/BMP2	18
GO:0034774	secretory granule lumen	26/400	321/18678	7.11432e-09	3.42377e-07	2.70531e-07	HSPA6/TGFB3/MIF/IGF2/INS/VEGFB/GHRL/ELANE/PF4/HGF/HSPA8/S100P/PSMD1/GRN/MAPK14/PDGFB/PSMD14/HSP90AA1/HMGB1/CXCL1/CAMP/PSMC3/GCG/TGFB2/CHIT1/GPI	26
GO:0030139	endocytic vesicle	24/400	289/18678	1.68774e-08	7.2198e-07	5.70477e-07	RAB11B/HLA-F/TAP2/PDIA3/TAPBP/SLC11A1/LRP1/ITGAV/TLR1/TLR6/UNC93B1/HSP90AA1/HLA-DRB1/HLA-B/GNLY/CD74/TAP1/IGF2R/HLA-DRA/SFTPD/WNT5A/RABEP1/CALR/HLA-DQB1	24
GO:0042611	MHC protein complex	8/400	25/18678	3.24397e-08	1.24893e-06	9.86848e-07	HLA-F/HLA-DMB/HLA-DRB1/HLA-B/HLA-DMA/CD74/HLA-DRA/HLA-DQB1	8
GO:0000502	proteasome complex	11/400	61/18678	6.06015e-08	2.12105e-06	1.67597e-06	PSMD4/PSMC5/PSMB8/PSMB9/PSME1/PSMD1/PSMD14/PSME2/PSMC4/PSMC3/PSMD8	11
GO:1905369	endopeptidase complex	11/400	62/18678	7.22719e-08	2.31872e-06	1.83216e-06	PSMD4/PSMC5/PSMB8/PSMB9/PSME1/PSMD1/PSMD14/PSME2/PSMC4/PSMC3/PSMD8	11
GO:0071556	integral component of lumenal side of endoplasmic reticulum membrane	8/400	29/18678	1.19423e-07	3.28412e-06	2.59497e-06	HLA-F/TAPBP/HLA-DRB1/HLA-B/CD74/HLA-DRA/CALR/HLA-DQB1	8
GO:0098553	lumenal side of endoplasmic reticulum membrane	8/400	29/18678	1.19423e-07	3.28412e-06	2.59497e-06	HLA-F/TAPBP/HLA-DRB1/HLA-B/CD74/HLA-DRA/CALR/HLA-DQB1	8
GO:1905368	peptidase complex	11/400	72/18678	3.54736e-07	9.10489e-06	7.19429e-06	PSMD4/PSMC5/PSMB8/PSMB9/PSME1/PSMD1/PSMD14/PSME2/PSMC4/PSMC3/PSMD8	11
GO:0030666	endocytic vesicle membrane	16/400	161/18678	3.8659e-07	9.30232e-06	7.3503e-06	RAB11B/HLA-F/TAP2/TAPBP/SLC11A1/LRP1/TLR1/TLR6/HLA-DRB1/HLA-B/CD74/TAP1/HLA-DRA/WNT5A/CALR/HLA-DQB1	16
GO:0042613	MHC class II protein complex	6/400	16/18678	6.20503e-07	1.38174e-05	1.09179e-05	HLA-DMB/HLA-DRB1/HLA-DMA/CD74/HLA-DRA/HLA-DQB1	6
GO:0045335	phagocytic vesicle	14/400	128/18678	6.46007e-07	1.38174e-05	1.09179e-05	RAB11B/HLA-F/TAP2/PDIA3/TAPBP/SLC11A1/ITGAV/TLR1/TLR6/UNC93B1/HLA-B/GNLY/TAP1/CALR	14
GO:0009897	external side of plasma membrane	17/400	199/18678	1.43031e-06	2.89826e-05	2.29008e-05	PDGFRA/TNFRSF13C/ITGB2/PDCD1/HFE/IL13/IL1R1/ITGAV/TFR2/TLR4/ENG/CD74/FLT3LG/TGFBR2/CALR/CD40/VCAM1	17
GO:0005925	focal adhesion	25/400	397/18678	1.67381e-06	3.20621e-05	2.53341e-05	PTK2B/PTK2/FGFR3/ILK/PDIA3/RAC1/LIMS2/CD81/MAPK3/LRP1/ITGAV/MAP2K1/HSPA8/JAK1/SDC4/PAK4/ENG/PAK1/IGF2R/SYNE2/CALR/JAK2/FES/CBL/MAP2K2	25
GO:0035631	CD40 receptor complex	5/400	11/18678	1.8253e-06	3.20621e-05	2.53341e-05	TRAF3/RNF31/IKBKB/CHUK/CD40	5
GO:0005924	cell-substrate adherens junction	25/400	399/18678	1.83212e-06	3.20621e-05	2.53341e-05	PTK2B/PTK2/FGFR3/ILK/PDIA3/RAC1/LIMS2/CD81/MAPK3/LRP1/ITGAV/MAP2K1/HSPA8/JAK1/SDC4/PAK4/ENG/PAK1/IGF2R/SYNE2/CALR/JAK2/FES/CBL/MAP2K2	25
GO:0030055	cell-substrate junction	25/400	404/18678	2.28986e-06	3.83303e-05	3.0287e-05	PTK2B/PTK2/FGFR3/ILK/PDIA3/RAC1/LIMS2/CD81/MAPK3/LRP1/ITGAV/MAP2K1/HSPA8/JAK1/SDC4/PAK4/ENG/PAK1/IGF2R/SYNE2/CALR/JAK2/FES/CBL/MAP2K2	25
GO:0005912	adherens junction	28/400	496/18678	3.37283e-06	5.41058e-05	4.27521e-05	PTK2B/PTK2/FGFR3/ILK/PDIA3/RAC1/LIMS2/CD81/MAPK3/LRP1/ITGAV/MAP2K1/HSPA8/JAK1/OXTR/SDC4/PAK4/ENG/PAK1/JAG1/IGF2R/BMPR2/SYNE2/CALR/JAK2/FES/CBL/MAP2K2	28
GO:0030670	phagocytic vesicle membrane	10/400	74/18678	3.8422e-06	5.91699e-05	4.67535e-05	RAB11B/HLA-F/TAP2/TAPBP/SLC11A1/TLR1/TLR6/HLA-B/TAP1/CALR	10
GO:0031904	endosome lumen	7/400	34/18678	6.40008e-06	9.47705e-05	7.48836e-05	GH2/INS/PRLR/IL12B/NAPSA/CTSB/JAK2	7
GO:0045121	membrane raft	20/400	309/18678	1.23665e-05	0.000176337	0.000139334	PTK2B/SRC/ITGB2/TNFRSF1B/LAT/MAPK3/STAT6/TLR1/TLR6/TDGF1/SDC4/GHSR/IKBKB/RGS19/ZAP70/BMPR2/TGFBR2/FURIN/JAK2/CBL	20
GO:0098857	membrane microdomain	20/400	310/18678	1.29636e-05	0.00017825	0.000140845	PTK2B/SRC/ITGB2/TNFRSF1B/LAT/MAPK3/STAT6/TLR1/TLR6/TDGF1/SDC4/GHSR/IKBKB/RGS19/ZAP70/BMPR2/TGFBR2/FURIN/JAK2/CBL	20
GO:0098589	membrane region	20/400	321/18678	2.14685e-05	0.000285012	0.000225205	PTK2B/SRC/ITGB2/TNFRSF1B/LAT/MAPK3/STAT6/TLR1/TLR6/TDGF1/SDC4/GHSR/IKBKB/RGS19/ZAP70/BMPR2/TGFBR2/FURIN/JAK2/CBL	20
GO:0101002	ficolin-1-rich granule	14/400	185/18678	4.70116e-05	0.000603315	0.000476714	HSPA6/ITGB2/MIF/RAC1/SLC11A1/FCER1G/HSPA8/MAPK14/PSMD14/HSP90AA1/HMGB1/PSMC3/CTSB/GPI	14
