# Supplementary material for: Identifying Methylation-Driven Immune-related Molecular Subtypes Predicts the Prognosis of Hepatocellular Carcinoma
Source: Research Square preprint supplement (doi:10.21203/rs.3.rs-737824/v1), 2021-07-28
Supplement: Supplementary file 3 [file d02ccc4b64e4ed83b1c4813c.xlsx]

## Sheet: Supplementary Table 6-MF
Supplementary Tables 3:The top 30 items enriched Molecular function GO annotations
ID	Description	GeneRatio	BgRatio	pvalue	p.adjust	qvalue	geneID	Count
GO:0048018	receptor ligand activity	80/401	397/16969	9.73643e-52	5.18952e-49	3.98681e-49	GALP/IL23A/TGFA/SLURP1/BMP8B/TGFB3/ARTN/MIF/PRLH/IGF2/GMFB/TNFRSF11B/GPHA2/CCL28/INS/INS-IGF2/GDF5/ADM/GHRL/FGF20/FGF1/IL6/PF4/IL18/KL/PMCH/HGF/HDGF/IL13/MDK/IL12B/GRN/CXCL16/INHA/PDGFB/GUCA2A/BMP4/AMH/CCL27/UCN2/CLCF1/TDGF1/FGF14/UTS2/CMTM8/SCT/GDF10/NMB/FGF11/IL22/HMGB1/GDF15/EDN2/NRG2/JAG1/FGF18/INHBE/FGF2/STC2/CRLF1/TNFSF11/PROK1/CXCL1/FLT3LG/WNT5A/ANGPTL3/SPP1/RABEP1/TGFB2/TNFSF4/NRG4/FGF7/I…	80
GO:0030545	receptor regulator activity	81/401	425/16969	2.03552e-50	5.42466e-48	4.16746e-48	GALP/IL23A/TGFA/SLURP1/BMP8B/TGFB3/ARTN/MIF/PRLH/IGF2/GMFB/TNFRSF11B/GPHA2/CCL28/INS/INS-IGF2/GDF5/ADM/GHRL/FGF20/FGF1/IL6/PF4/IL18/KL/WFIKKN1/PMCH/HGF/HDGF/IL13/MDK/IL12B/GRN/CXCL16/INHA/PDGFB/GUCA2A/BMP4/AMH/CCL27/UCN2/CLCF1/TDGF1/FGF14/UTS2/CMTM8/SCT/GDF10/NMB/FGF11/IL22/HMGB1/GDF15/EDN2/NRG2/JAG1/FGF18/INHBE/FGF2/STC2/CRLF1/TNFSF11/PROK1/CXCL1/FLT3LG/WNT5A/ANGPTL3/SPP1/RABEP1/TGFB2/TNFSF4/NRG…	81
GO:0008083	growth factor activity	44/401	147/16969	1.89005e-36	3.35799e-34	2.57975e-34	TGFA/BMP8B/TGFB3/ARTN/IGF2/GMFB/GDF5/FGF20/FGF1/IL6/HGF/HDGF/MDK/IL12B/GRN/INHA/PDGFB/BMP4/AMH/CLCF1/TDGF1/FGF14/GDF10/FGF11/GDF15/NRG2/JAG1/FGF18/INHBE/FGF2/PROK1/CXCL1/ANGPTL3/RABEP1/TGFB2/NRG4/FGF7/IL7/GDF1/IL4/CNTF/GPI/BMP2/RABEP2	44
GO:0003707	steroid hormone receptor activity	23/401	54/16969	1.15406e-23	1.53779e-21	1.1814e-21	NR1D2/NR1H3/ESR1/NR2C1/RXRB/PGRMC2/NR2F2/RARA/RARB/NR4A1/NR2E3/RARG/RXRG/VDR/ESRRA/NR6A1/RXRA/NR1H2/PPARG/PPARD/NR5A2/RORA/RORC	23
GO:0004879	nuclear receptor activity	21/401	46/16969	1.67443e-22	1.48746e-20	1.14273e-20	NR1D2/NR1H3/ESR1/RXRB/NR2F2/RARA/RARB/NR4A1/STAT3/NR2E3/RARG/RXRG/VDR/ESRRA/RXRA/NR1H2/PPARG/PPARD/NR5A2/RORA/RORC	21
GO:0098531	transcription factor activity, direct ligand regulated sequence-specific DNA binding	21/401	46/16969	1.67443e-22	1.48746e-20	1.14273e-20	NR1D2/NR1H3/ESR1/RXRB/NR2F2/RARA/RARB/NR4A1/STAT3/NR2E3/RARG/RXRG/VDR/ESRRA/RXRA/NR1H2/PPARG/PPARD/NR5A2/RORA/RORC	21
GO:0005125	cytokine activity	31/401	154/16969	2.6218e-20	1.99631e-18	1.53365e-18	IL23A/SLURP1/MIF/TNFRSF11B/CCL28/IL6/PF4/IL18/IL13/IL12B/GRN/CXCL16/INHA/BMP4/CCL27/CLCF1/CMTM8/IL22/HMGB1/FGF2/CRLF1/TNFSF11/FLT3LG/WNT5A/SPP1/TGFB2/TNFSF4/IL7/CCL23/IL4/GPI	31
GO:0005126	cytokine receptor binding	35/401	210/16969	5.79878e-20	3.86343e-18	2.96806e-18	IL23A/TGFB3/PIK3R1/IL12RB1/MIF/CCL28/TRAF3/IL6/BID/PF4/IL18/STAT3/IL13/JAK1/IL12B/CXCL16/CCL20/AMH/CCL27/CLCF1/MADD/PLCG1/IL22/ENG/TYK2/CRLF1/TNFSF11/TGFBR2/TGFB2/TNFSF4/JAK2/IL7/CCL23/IL4/CNTF	35
GO:0019955	cytokine binding	22/401	100/16969	1.2596e-15	7.45965e-14	5.73082e-14	TGFB3/TNFRSF1B/IL12RB1/IL22RA1/GDF5/ELANE/WFIKKN1/IL1R1/ITGAV/CSF3R/IL12B/CCR6/ENG/HMGB1/CD74/IL1R2/CRLF1/BMPR2/ACVRL1/TGFBR2/LTBP4/LTBP1	22
GO:0042277	peptide binding	29/401	215/16969	3.07654e-14	1.6398e-12	1.25976e-12	PIK3R1/ITGB2/AGER/CALCR/NOD2/HLA-F/TAPBP/GHR/SLC40A1/LRP1/NPR1/PRLR/OXTR/TLR6/GHSR/HLA-DRB1/HLA-B/TLR4/CD74/RXRA/PPARG/LANCL1/TAP1/VIPR1/HLA-DRA/TGFB2/CALR/FURIN/HLA-DQB1	29
GO:0019838	growth factor binding	22/401	121/16969	8.41401e-14	4.07697e-12	3.13211e-12	PDGFRA/FGFR3/FGFR4/TGFB3/SORT1/KL/WFIKKN1/IL1R1/ITGAV/PDGFB/ACVR2B/ENG/S100A13/CRIM1/IL1R2/IGF2R/ACVRL1/TGFBR2/LTBP4/LTBP1/FURIN/LTBP2	22
GO:0004896	cytokine receptor activity	18/401	78/16969	2.10052e-13	9.32979e-12	7.16755e-12	LEPR/IL12RB1/IL4R/IL22RA1/GPR17/IL17RC/EPOR/IL1R1/PRLR/IL1RAP/IL10RB/CCR6/CD74/IL1RL2/IL1R2/IL21R/IL18RAP/IL15RA	18
GO:0005179	hormone activity	20/401	103/16969	3.15323e-13	1.29283e-11	9.93205e-12	GALP/PRLH/IGF2/GPHA2/INS/INS-IGF2/ADM/GHRL/KL/PMCH/INHA/GUCA2A/AMH/UCN2/UTS2/SCT/NMB/EDN2/INHBE/STC2	20
GO:0033218	amide binding	29/401	266/16969	7.27472e-12	2.59649e-10	1.99474e-10	PIK3R1/ITGB2/AGER/CALCR/NOD2/HLA-F/TAPBP/GHR/SLC40A1/LRP1/NPR1/PRLR/OXTR/TLR6/GHSR/HLA-DRB1/HLA-B/TLR4/CD74/RXRA/PPARG/LANCL1/TAP1/VIPR1/HLA-DRA/TGFB2/CALR/FURIN/HLA-DQB1	29
GO:0070851	growth factor receptor binding	20/401	121/16969	7.30721e-12	2.59649e-10	1.99474e-10	PDGFRA/TGFA/SRC/IL12RB1/CBLC/FGF20/FGF1/IL6/IL1R1/IL12B/PDGFB/FGF18/FGF2/VAV2/JAK2/FGF7/IL7/IL4/CBL/CNTF	20
GO:0004713	protein tyrosine kinase activity	18/401	120/16969	4.33132e-10	1.44287e-08	1.10848e-08	PDGFRA/PTK2B/PTK2/FGFR3/FGFR4/FGFRL1/SRC/MAP2K1/JAK1/EIF2AK2/CRIM1/ZAP70/TYK2/IGF2R/MET/JAK2/FES/MAP2K2	18
GO:0023026	MHC class II protein complex binding	8/401	16/16969	9.89539e-10	3.1025e-08	2.38347e-08	CD81/HLA-DMB/HSPA8/HSP90AA1/HLA-DRB1/HLA-DMA/CD74/HLA-DRA	8
GO:0005178	integrin binding	17/401	113/16969	1.26949e-09	3.7591e-08	2.88791e-08	ILK/SRC/IGF2/ICAM2/CD81/FGF1/ITGAV/VTN/PRKCA/ISG15/HMGB1/FGF2/LTBP4/ANGPTL3/SPP1/CALR/VCAM1	17
GO:0045309	protein phosphorylated amino acid binding	11/401	44/16969	4.26164e-09	1.1955e-07	9.18437e-08	PIK3R1/CBLC/MAPK3/SH3BP2/NEDD4/PIK3R2/ZAP70/PIK3R3/VAV1/VAV2/CBL	11
GO:0001784	phosphotyrosine residue binding	10/401	37/16969	9.57055e-09	2.55055e-07	1.95944e-07	PIK3R1/CBLC/MAPK3/SH3BP2/PIK3R2/ZAP70/PIK3R3/VAV1/VAV2/CBL	10
GO:0050431	transforming growth factor beta binding	8/401	21/16969	1.41028e-08	3.57941e-07	2.74986e-07	TGFB3/WFIKKN1/ITGAV/ENG/ACVRL1/TGFBR2/LTBP4/LTBP1	8
GO:0001664	G protein-coupled receptor binding	21/401	205/16969	1.8431e-08	4.46532e-07	3.43045e-07	PRLH/PSMC5/GPHA2/CCL28/ADM/GHRL/PF4/STAT3/HSPA8/JAK1/CXCL16/CCL20/NEDD4/CCL27/UCN2/SCT/EDN2/TYK2/WNT5A/JAK2/CCL23	21
GO:0051427	hormone receptor binding	19/401	170/16969	2.15584e-08	4.99593e-07	3.83809e-07	DAXX/ESR1/PTHLH/SRC/PSMC5/GPHA2/RARB/OASL/STAT3/JAK1/RARG/VDR/UCN2/RXRA/PPARG/TYK2/JUND/CALR/JAK2	19
GO:0051219	phosphoprotein binding	13/401	76/16969	2.34106e-08	5.1991e-07	3.99417e-07	PIK3R1/SRC/CBLC/MAPK3/SH3BP2/NEDD4/PIK3R2/ZAP70/PIK3R3/VAV1/IGF2R/VAV2/CBL	13
GO:0019199	transmembrane receptor protein kinase activity	12/401	65/16969	3.34841e-08	7.13882e-07	5.48435e-07	PDGFRA/FGFR3/FGFR4/FGFRL1/ACVR2B/CRIM1/IGF2R/BMPR2/ACVRL1/TGFBR2/LTBP4/LTBP1	12
GO:0042562	hormone binding	13/401	81/16969	5.17066e-08	1.05999e-06	8.14327e-07	PIK3R1/CALCR/GHR/SLC40A1/NPR1/PRLR/OXTR/VDR/UCN2/GHSR/MCHR1/VIPR1/CALR	13
GO:0023023	MHC protein complex binding	8/401	25/16969	6.89889e-08	1.36189e-06	1.04626e-06	CD81/HLA-DMB/HSPA8/HSP90AA1/HLA-DRB1/HLA-DMA/CD74/HLA-DRA	8
GO:0004715	non-membrane spanning protein tyrosine kinase activity	9/401	37/16969	1.45492e-07	2.76955e-06	2.12769e-06	PTK2B/PTK2/SRC/JAK1/EIF2AK2/ZAP70/TYK2/JAK2/FES	9
GO:0017046	peptide hormone binding	9/401	38/16969	1.86699e-07	3.43139e-06	2.63614e-06	PIK3R1/CALCR/GHR/SLC40A1/NPR1/PRLR/OXTR/GHSR/VIPR1	9
GO:0042056	chemoattractant activity	8/401	29/16969	2.51995e-07	4.47711e-06	3.43951e-06	MIF/HGF/PDGFB/BMP4/HMGB1/FGF2/WNT5A/FGF7	8
