# Supplementary material for: Identifying Methylation-Driven Immune-related Molecular Subtypes Predicts the Prognosis of Hepatocellular Carcinoma
Source: Research Square preprint supplement (doi:10.21203/rs.3.rs-737824/v1), 2021-07-28
Supplement: Supplementary file 4 [file fd37d7e0587b1e85c05733ac.xlsx]

## Sheet: Supplementary Table 7-KEGG
Supplementary Tables 4:The top 20 items enriched KEGG pathways
ID	Description	GeneRatio	BgRatio	pvalue	p.adjust	qvalue	geneID	Count
hsa04060	Cytokine-cytokine receptor interaction	67/306	294/7248	3.8345e-32	6.63369e-30	3.22905e-30	TNFRSF10D/IL23A/TNFRSF13C/LEPR/BMP8B/TGFB3/TNFRSF1B/IL12RB1/IL4R/IL22RA1/CXCL17/CSH2/GH2/TNFRSF11B/CCL28/GDF5/TNFRSF10B/IL17RC/GHR/EPOR/IL6/PF4/IL18/IL13/IL1R1/PRLR/CSF3R/IL12B/TNFRSF19/CXCL16/INHA/CCL20/BMP4/AMH/CCL27/CLCF1/TNFRSF8/IL1RAP/TNFRSF18/GDF10/ACVR2B/IL10RB/CCR6/IL22/GDF15/IL1RL2/IL1R2/IL21R/INHBE/TNFSF11/BMPR2/CXCL1/ACVRL1/LTBR/TGFBR2/IL18RAP/TGFB2/TNFSF4/CCL22/IL7/CCL23/IL15RA/GDF1/C…	67
hsa04659	Th17 cell differentiation	40/306	107/7248	2.83831e-28	2.45514e-26	1.19508e-26	IL23A/RXRB/IL12RB1/IL4R/RARA/LAT/NFATC3/HLA-DMB/MAPK3/IL6/PPP3CC/STAT6/STAT3/IL1R1/FOS/JAK1/MAPK14/RXRG/PPP3CB/MAPK8/IL1RAP/HSP90AA1/PLCG1/HLA-DRB1/IKBKB/IL22/HLA-DMA/RXRA/ZAP70/TYK2/IL21R/CHUK/RORA/HLA-DRA/TGFBR2/RORC/JAK2/IL4/HLA-DQB1/NFKBIB	40
hsa04660	T cell receptor signaling pathway	34/306	104/7248	6.30325e-22	3.63488e-20	1.76933e-20	NRAS/NCK1/PIK3R1/LAT/PDCD1/MAP3K8/NFATC3/MAPK3/PPP3CC/MAP2K1/FOS/AKT1/MAPK14/PPP3CB/MAPK8/PAK4/PLCG1/PIK3R2/IKBKB/RAF1/PAK1/MALT1/ZAP70/PIK3R3/PIK3CB/VAV1/CHUK/SOS1/CDK4/PAK2/VAV2/IL4/MAP2K2/NFKBIB	34
hsa04662	B cell receptor signaling pathway	28/306	82/7248	8.3654e-19	3.61804e-17	1.76114e-17	NRAS/PIK3R1/RAC1/RASGRP3/NFATC3/CD81/MAPK3/PPP3CC/MAP2K1/CD72/FOS/AKT1/IFITM1/PPP3CB/BLNK/PIK3R2/IKBKB/RAF1/MALT1/PIK3R3/PIK3CB/VAV1/CHUK/SOS1/VAV2/CR2/MAP2K2/NFKBIB	28
hsa04612	Antigen processing and presentation	27/306	78/7248	2.39935e-18	8.30174e-17	4.04101e-17	HSPA6/RFX5/HLA-F/TAP2/PDIA3/TAPBP/RFXANK/NFYC/HLA-DMB/HSPA8/PSME1/CIITA/PSME2/RFXAP/CREB1/HSPA4/HSP90AA1/HLA-DRB1/HLA-B/HLA-DMA/CD74/TAP1/HLA-DRA/CTSB/CALR/HLA-DQB1/HSPA2	27
hsa01521	EGFR tyrosine kinase inhibitor resistance	27/306	79/7248	3.50879e-18	1.0117e-16	4.92462e-17	PDGFRA/NRAS/TGFA/FGFR3/PIK3R1/SRC/MAPK3/IL6/HGF/STAT3/MAP2K1/AKT1/JAK1/PDGFB/PRKCA/PLCG1/BRAF/PIK3R2/RAF1/NRG2/PIK3R3/FGF2/PIK3CB/SOS1/MET/JAK2/MAP2K2	27
hsa04010	MAPK signaling pathway	50/306	295/7248	5.86884e-18	1.45044e-16	7.06026e-17	PDGFRA/DAXX/NRAS/TGFA/FGFR3/FGFR4/HSPA6/TGFB3/IGF2/RAC1/INS/VEGFB/RASGRP3/BDNF/MAP3K8/NFATC3/FGF20/FGF1/MAPK3/NR4A1/PPP3CC/HGF/IL1R1/MAP2K1/HSPA8/FOS/AKT1/MAPK14/PDGFB/PPP3CB/PRKCA/MAPK8/IL1RAP/BRAF/IKBKB/RAF1/PAK1/FGF18/FGF2/JUND/CHUK/SOS1/FLT3LG/TGFBR2/PAK2/TGFB2/MET/FGF7/HSPA2/MAP2K2	50
hsa04630	JAK-STAT signaling pathway	37/306	162/7248	7.12048e-18	1.5398e-16	7.49524e-17	PDGFRA/IL23A/LEPR/PIK3R1/IL12RB1/IL4R/IL22RA1/CSH2/GH2/GHR/EPOR/IL6/SOCS1/STAT6/STAT3/IL13/PRLR/AKT1/CSF3R/JAK1/IL12B/PDGFB/IL10RB/PIK3R2/IRF9/RAF1/IL22/PIK3R3/TYK2/IL21R/PIK3CB/SOS1/JAK2/IL7/IL15RA/IL4/CNTF	37
hsa04650	Natural killer cell mediated cytotoxicity	33/306	131/7248	2.04411e-17	3.92923e-16	1.91262e-16	NRAS/PTK2B/PIK3R1/ITGB2/RAC1/LAT/TNFRSF10B/ICAM2/MICB/MAPK3/SH3BP2/BID/FCER1G/PPP3CC/MAP2K1/ULBP2/PPP3CB/PRKCA/PLCG1/BRAF/HLA-B/PIK3R2/RAF1/PAK1/ZAP70/PIK3R3/MICA/PIK3CB/VAV1/SOS1/VAV2/MAP2K2/KLRK1	33
hsa04658	Th1 and Th2 cell differentiation	28/306	92/7248	2.72124e-17	4.70775e-16	2.29157e-16	IL12RB1/IL4R/LAT/NFATC3/HLA-DMB/MAPK3/PPP3CC/STAT6/IL13/FOS/JAK1/IL12B/MAPK14/PPP3CB/MAPK8/PLCG1/HLA-DRB1/IKBKB/HLA-DMA/ZAP70/TYK2/JAG1/CHUK/HLA-DRA/JAK2/IL4/HLA-DQB1/NFKBIB	28
hsa04151	PI3K-Akt signaling pathway	54/306	354/7248	3.06734e-17	4.82409e-16	2.3482e-16	PDGFRA/NRAS/PTK2/TGFA/FGFR3/FGFR4/PIK3R1/IGF2/IL4R/CSH2/GH2/RAC1/INS/VEGFB/BDNF/GHR/FGF20/EPOR/FGF1/MAPK3/IL6/NR4A1/HGF/ITGAV/PRLR/MAP2K1/AKT1/CSF3R/JAK1/VTN/PDGFB/PRKCA/CREB1/HSP90AA1/PIK3R2/IKBKB/RAF1/TLR4/RXRA/PIK3R3/FGF18/FGF2/PIK3CB/CHUK/SOS1/FLT3LG/CDK4/SPP1/MET/JAK2/FGF7/IL7/IL4/MAP2K2	54
hsa04014	Ras signaling pathway	41/306	232/7248	1.73077e-15	2.49519e-14	1.21458e-14	PDGFRA/NRAS/TGFA/FGFR3/FGFR4/PIK3R1/IGF2/RAC1/LAT/INS/VEGFB/RASGRP3/BDNF/FGF20/FGF1/MAPK3/HGF/RGL2/MAP2K1/AKT1/PDGFB/PRKCA/MAPK8/PAK4/PLCG1/PIK3R2/IKBKB/RAF1/PAK1/ZAP70/PIK3R3/FGF18/FGF2/PIK3CB/CHUK/SOS1/FLT3LG/PAK2/MET/FGF7/MAP2K2	41
hsa04917	Prolactin signaling pathway	23/306	70/7248	3.19665e-15	4.254e-14	2.0707e-14	NRAS/ESR1/PIK3R1/SRC/INS/MAPK3/SOCS1/STAT3/PRLR/MAP2K1/FOS/AKT1/MAPK14/MAPK8/PIK3R2/RAF1/PIK3R3/PIK3CB/TNFSF11/SOS1/LHB/JAK2/MAP2K2	23
hsa04012	ErbB signaling pathway	25/306	85/7248	3.642e-15	4.50047e-14	2.19068e-14	NRAS/PTK2/TGFA/NCK1/PIK3R1/SRC/MAPK3/MAP2K1/AKT1/PRKCA/MAPK8/PAK4/PLCG1/BRAF/PIK3R2/RAF1/PAK1/NRG2/PIK3R3/PIK3CB/SOS1/PAK2/NRG4/CBL/MAP2K2	25
hsa04620	Toll-like receptor signaling pathway	27/306	104/7248	8.64294e-15	9.96819e-14	4.85218e-14	IRF5/TLR3/IRF7/PIK3R1/RAC1/MAP3K8/TRAF3/MAPK3/IL6/MAP2K1/FOS/AKT1/IL12B/MAPK14/TLR1/TLR6/MAPK8/PIK3R2/IKBKB/TLR4/PIK3R3/PIK3CB/CHUK/SPP1/IRF3/CD40/MAP2K2	27
hsa04360	Axon guidance	35/306	181/7248	1.40993e-14	1.52448e-13	7.42067e-14	NRAS/PTK2/NCK1/ILK/SEMA4G/PIK3R1/SEMA4D/SRC/PLXNB2/SEMA4C/RAC1/PLXNB1/NFATC3/MAPK3/PPP3CC/ROBO3/NFATC4/PPP3CB/PRKCA/ROBO2/SEMA4B/PAK4/ROBO1/PLCG1/PIK3R2/RAF1/PAK1/PIK3R3/PIK3CB/BMPR2/WNT5A/PAK2/MET/FES/SEMA6C	35
hsa04664	Fc epsilon RI signaling pathway	22/306	68/7248	1.88698e-14	1.92028e-13	9.34727e-14	NRAS/PIK3R1/RAC1/LAT/MAPK3/FCER1G/IL13/MAP2K1/AKT1/MAPK14/PRKCA/MAPK8/PLCG1/PIK3R2/RAF1/PIK3R3/PIK3CB/VAV1/SOS1/VAV2/IL4/MAP2K2	22
hsa04380	Osteoclast differentiation	29/306	128/7248	4.03996e-14	3.88285e-13	1.89004e-13	PIK3R1/CALCR/RAC1/TNFRSF11B/MAPK3/SOCS1/PPP3CC/IL1R1/MAP2K1/FOS/AKT1/JAK1/MAPK14/PPP3CB/MAPK8/CREB1/BLNK/PIK3R2/IKBKB/IRF9/PPARG/PIK3R3/TYK2/JUND/PIK3CB/CHUK/TNFSF11/TGFBR2/TGFB2	29
hsa04935	Growth hormone synthesis, secretion and action	27/306	119/7248	3.07772e-13	2.80234e-12	1.36409e-12	NRAS/PTK2/PIK3R1/CSH2/GH2/GHRL/GHR/MAPK3/SOCS1/STAT3/MAP2K1/FOS/AKT1/MAPK14/PRKCA/MAPK8/CREB1/GHSR/PLCG1/PIK3R2/RAF1/PIK3R3/PIK3CB/SSTR1/SOS1/JAK2/MAP2K2	27
hsa04625	C-type lectin receptor signaling pathway	25/306	104/7248	5.98062e-13	5.17324e-12	2.51816e-12	IL23A/NRAS/PIK3R1/SRC/NFATC3/MAPK3/IL6/FCER1G/PPP3CC/AKT1/IL12B/NFATC4/MAPK14/PPP3CB/MAPK8/PIK3R2/IKBKB/IRF9/RAF1/PAK1/MALT1/PIK3R3/PIK3CB/CHUK/CCL22	25
